# Supplementary material for: Electroacupuncture Alleviates Mechanical Allodynia of a Rat Model of CRPS-I and Modulates Gene Expression Profiles in Dorsal Root Ganglia
Source: Front Neurol. 2020 Oct 30;11:580997. doi: 10.3389/fneur.2020.580997 (PMC7661737; doi:10.3389/fneur.2020.580997)
Supplement: Supplementary file 1 [file Table_1.xlsx]

## Sheet: 85genes up-regulated 
The 85 genes decreased in CPIP group but increased in CPIP+EA group
Gene ID	Other Gene ID	log2(CPIP+EA/model)	Qvalue(CPIP-vs-CPIP+EA)	Pvalue(CPIP-vs-CPIP+EA)	log2(CPIP/Sham)	Qvalue(Sham-vs-CPIP)	Pvalue(Sham-vs-CPIP)
100360880	Fosb	1.66458	3.54148e-25	6.97921e-27	-1.11149	7.53634e-10	7.60291e-11
100363502	LOC100363502	1.02281	4.29369e-50	3.67009e-52	-1.21682	5.88646e-76	6.53327e-78
100909849	LOC100909849	1.85568	9.90722e-13	4.39882e-14	-2.37556	1.08178e-24	4.24705e-26
100910497	LOC100910497	6.38946	3.41696e-10	1.96335e-11	-6.81606	1.80232e-13	1.35846e-14
100910669	LOC100910669	0.631425	0.00218322	0.00044839	-0.587939	0.00406798	0.00119007
100911422	LOC100911422	3.68592	2.38712e-136	4.91211e-139	-1.9917	1.19964e-22	5.2364e-24
100911725	LOC100911725	6.094	1.69805e-08	1.20818e-09	-5.32197	2.01769e-05	3.46939e-06
100911813	LOC100911813	1.43171	2.59111e-09	1.65494e-10	-1.03518	8.45262e-05	1.62873e-05
100911814	LOC100911814	5.10071	0.000125948	1.83812e-05	-4.40587	0.00362952	0.00104526
100912471	LOC100912471	2.70101	8.3817e-12	4.10187e-13	-1.72438	0.000420026	9.37229e-05
102546376	LOC102546376	1.72217	0.00026488	4.18229e-05	-1.801	7.42809e-05	1.42122e-05
102553099	LOC102553099	5.12889	0.000105527	1.50167e-05	-5.40519	1.05398e-05	1.73636e-06
102555474	LOC102555474	0.820149	1.77982e-05	2.09182e-06	-0.881375	1.77829e-06	2.61587e-07
103689921	NEWGENE_1306267	0.635316	1.28321e-06	1.2441e-07	-0.955161	7.17136e-16	4.639e-17
103690057	LOC103690057	7.9867	1.04772e-26	1.96524e-28	-7.54898	7.30344e-21	3.55694e-22
103692570	LOC103692570	1.38772	7.07286e-07	6.51583e-08	-2.10606	3.15632e-19	1.6653e-20
103694857	LOC103694857	0.957132	1.87897e-105	5.65101e-108	-1.21241	3.98004e-185	1.68124e-187
103694874	LOC103694874	7.51659	3.30958e-20	8.43432e-22	-7.01953	3.17549e-15	2.1278e-16
103694908	LOC103694908	1.13994	4.22662e-13	1.79969e-14	-0.796028	3.08016e-06	4.68655e-07
108348062	LOC108348062	0.635071	1.5514e-40	1.68216e-42	-0.599768	5.13928e-36	1.33661e-37
108348131	Slc40a1	5.9138	1.31831e-07	1.0778e-08	-6.80503	2.20388e-13	1.67937e-14
108349606	LOC108349606	8.26887	1.71479e-31	2.64648e-33	-6.88712	4.65268e-14	3.35655e-15
108349745	LOC108349745	1.29081	1.98228e-07	1.67576e-08	-1.17813	2.96118e-06	4.49327e-07
113882	Hemgn	1.02787	5.24054e-18	1.5512e-19	-1.20574	2.24679e-26	8.29984e-28
114021	Ebna1bp2	9.33176	3.36529e-14	1.32374e-15	-11.773	1.2535e-51	2.16991e-53
171402	Elovl6	0.734859	5.32352e-27	9.77482e-29	-0.752834	9.76167e-29	3.25837e-30
24440	Hbb	1.13391	0	0	-0.740525	0	0
246358	Ppbp	4.69347	2.04971e-06	2.05213e-07	-4.90405	1.45752e-07	1.85187e-08
24779	Slc4a1	0.857254	9.13118e-54	7.22684e-56	-0.910777	5.16997e-62	7.02269e-64
25542	Ccl3	1.8675	0.000798684	0.000144818	-1.73412	0.00213191	0.000570352
25748	Alas2	1.10666	2.99101e-45	2.76965e-47	-0.920318	9.93339e-30	3.21696e-31
287167	Hba-a1	1.51751	4.20346e-21	9.88065e-23	-1.17482	9.7464e-12	8.42785e-13
289257	Spta1	0.942118	6.91269e-18	2.06258e-19	-1.0988	1.01651e-25	3.84769e-27
289337	Tlr5	0.740639	0.0010637	0.000200027	-0.951928	4.63169e-06	7.24674e-07
291604	Dcp2	4.52844	1.44777e-07	1.19166e-08	-6.10385	1.41005e-22	6.17822e-24
29269	Mcpt8	1.52036	1.10874e-07	8.92426e-09	-2.38612	2.71646e-24	1.09573e-25
293522	Ahsp	1.06749	1.46674e-20	3.57541e-22	-0.855981	9.26635e-13	7.46782e-14
29692	Pla2g2a	1.12548	0.00286723	0.000620188	-1.02464	0.00698266	0.00221482
296959	Cpa2	0.669024	0.0027319	0.000584646	-0.724139	0.000737094	0.000173381
297025	Kel	0.775795	0.000176685	2.67368e-05	-0.824321	3.80735e-05	6.89989e-06
297832	Cntnap5a	0.699176	0.00641729	0.00158311	-0.980033	1.97711e-05	3.39307e-06
298485	Ermap	1.07101	1.02198e-06	9.67376e-08	-1.47163	5.80114e-14	4.20429e-15
300802	Aph1b	6.22338	3.33579e-09	2.16752e-10	-6.81452	1.85235e-13	1.39923e-14
304349	RGD1559588	2.84372	1.18339e-10	6.51867e-12	-2.0951	4.85571e-05	8.9526e-06
304361	Mepce	0.749408	5.24036e-14	2.09447e-15	-0.673375	2.28682e-11	2.03427e-12
304379	Zan	1.38005	0.00758308	0.00192591	-1.58212	0.000964832	0.000233589
304666	Klf1	0.778627	5.61224e-05	7.43555e-06	-0.734123	0.00013835	2.79872e-05
304929	F5	0.929832	5.52204e-05	7.28983e-06	-0.810389	0.000567673	0.000130195
306460	Enpp6	0.874706	0.00383615	0.000868024	-1.03274	0.000253177	5.38926e-05
306871	Dsp	0.773539	1.47036e-10	8.18089e-12	-1.84709	6.66102e-84	6.39986e-86
310218	Car1	0.604461	0.000461075	7.73257e-05	-1.18918	1.29809e-16	8.04226e-18
311336	Nusap1	0.943638	3.07336e-07	2.67807e-08	-0.591338	0.00364979	0.00105186
311832	Gfi1b	0.982963	0.00541681	0.00129257	-1.03139	0.0024482	0.000668555
312677	Ccdc77	0.787246	6.72781e-14	2.72625e-15	-0.721249	9.81927e-12	8.49899e-13
312689	M6pr	0.6727	0.000877888	0.000160802	-1.26371	5.82021e-14	4.22293e-15
313450	Rnf113a1	7.46014	1.56928e-19	4.11103e-21	-8.91017	9.34996e-46	1.88961e-47
315111	Apol2	2.37987	8.84009e-12	4.38678e-13	-1.85779	1.67522e-06	2.45178e-07
316820	LOC316820	0.788414	6.71458e-05	9.07139e-06	-1.1025	5.81339e-10	5.80214e-11
353302	Kif15	0.742703	7.67588e-05	1.05098e-05	-0.684773	0.000271944	5.83831e-05
360243	Top2a	0.701765	6.5977e-11	3.47767e-12	-0.585122	1.07556e-07	1.34341e-08
360479	LOC360479	0.823101	0.00286342	0.00061891	-0.732359	0.00839999	0.00273428
360918	Pf4	0.897057	2.34037e-06	2.36536e-07	-0.605732	0.00322347	0.000914708
361619	Hbb-b1	0.861281	4.44508e-18	1.30168e-19	-2.15837	3.63774e-175	1.65716e-177
362202	Epb42	0.878653	1.17811e-06	1.13381e-07	-0.861069	1.54225e-06	2.24055e-07
364991	Slc25a36l1	1.45875	7.84822e-07	7.28603e-08	-1.2314	6.67804e-05	1.26444e-05
367975	LOC367975	4.51408	0.00285187	0.000615738	-4.57851	0.00172827	0.000448195
497912	Btnl10	0.938919	4.36413e-05	5.65415e-06	-1.11252	2.34823e-07	3.05165e-08
498109	Polr2h	7.18502	1.43309e-16	4.75235e-18	-7.00368	4.44375e-15	2.99235e-16
498894	RGD1560813	0.93363	0.000391525	6.44531e-05	-0.718575	0.00925357	0.00306808
499617	Rfxap	2.1042	1.68472e-40	1.84004e-42	-1.81532	1.21125e-27	4.14339e-29
499636	RGD1563962	1.38812	4.83772e-96	1.64638e-98	-0.91031	2.00962e-35	5.35972e-37
499985	RGD1565355	0.740154	0.00683627	0.00170648	-1.0504	1.58368e-05	2.67197e-06
500624	Mfsd2b	1.14463	0.000380429	6.25061e-05	-0.927507	0.00582583	0.0017976
501116	LOC501116	1.05299	5.96902e-95	2.12587e-97	-1.50858	1.67673e-228	5.8329e-231
501506	Zbtb33	1.36183	5.97671e-10	3.50038e-11	-2.09681	1.68693e-29	5.47715e-31
58826	Prg2	1.25318	7.15989e-90	2.77667e-92	-0.604269	2.93875e-17	1.73306e-18
60414	Rhd	1.23901	4.8431e-10	2.8173e-11	-1.45995	5.64537e-15	3.85761e-16
65207	Rhag	0.787165	0.000121472	1.76702e-05	-0.808891	5.21272e-05	9.67128e-06
679539	LOC679539	1.76891	7.36178e-16	2.58695e-17	-0.845777	0.00212609	0.000568619
680422	Fam115c	0.835489	8.57823e-07	8.00448e-08	-0.710035	4.47659e-05	8.2017e-06
682408	Cdsn	0.667096	5.54325e-11	2.9087e-12	-0.586111	1.32271e-08	1.49763e-09
684969	Potef	4.96664	0.000288156	4.59541e-05	-5.10149	9.51376e-05	1.85337e-05
685245	Ears2l1	1.13188	3.93597e-05	5.05379e-06	-1.66753	2.07522e-12	1.70338e-13
688972	Gypa	0.891603	1.05817e-12	4.71502e-14	-0.934954	2.43381e-14	1.71952e-15
81639	Alox15	0.889715	1.9162e-07	1.6106e-08	-0.669353	0.00020792	4.35185e-05

## Sheet: 6 genes down-regulated
The 6 genes decreased in both CPIP and CPIP+EA group
Gene ID	Other Gene ID	log2(CPIP+EA/model)	Qvalue(CPIP-vs-CPIP+EA)	Pvalue(CPIP-vs-CPIP+EA)	log2(CPIP/Sham)	Qvalue(Sham-vs-CPIP)	Pvalue(Sham-vs-CPIP)
100910581	LOC100910581	-8.04128	1.9278e-27	3.4787e-29	-0.821332	7.64415e-07	1.05798e-07
100910616	Hmgn5	-6.96117	2.10551e-14	8.23199e-16	-1.24636	2.0126e-08	2.33543e-09
103690014	LOC103690014	-3.8636	2.57659e-12	1.20315e-13	-0.797789	0.00222198	0.000598497
287382	Mfap4	-0.91341	3.51483e-08	2.63158e-09	-0.816855	8.12354e-12	6.97071e-13
315651	RGD1562811	-0.846509	0.000188775	2.87158e-05	-0.589175	0.000802817	0.000190375
364879	Isoc1	-9.00274	1.03289e-47	9.23748e-50	-1.24561	3.18253e-32	9.38413e-34
