# Supplementary material for: Electroacupuncture Alleviates Mechanical Allodynia of a Rat Model of CRPS-I and Modulates Gene Expression Profiles in Dorsal Root Ganglia
Source: Front Neurol. 2020 Oct 30;11:580997. doi: 10.3389/fneur.2020.580997 (PMC7661737; doi:10.3389/fneur.2020.580997)
Supplement: Supplementary file 3 [file Table_3.xlsx]

## Sheet: Up-regulated DEGs
Category	Term	Count	Genes
Biological process	neutrophil chemotaxis	10	S100a8,S100a9,Ccl24,Ppbp,Csf3r,Ccl3,Pf4,Ccl9,Cxcr2,Il1rn
	defense response to bacterium	14	Cebpe,RatNP-3b,Prg2,Pglyrp1,Hp,Tlr5,Camp,Epx,Np4,Elane,LOC100910270,Defa5,Mpo,Defa11
	defense response to fungus	6	Ctsg,RatNP-3b,Np4,Elane,Defa5,Mpo
	immune response	20	Ccl24,RT1-T24-4,Ppbp,RGD1562652,RT1-CE7,Prg2,Pglyrp1,RGD1565355,Ccl3,Pf4,Ccl9,Cxcr2,RT1-S3, Oas1e,Prg3,RT1-DMb,RT1-A1,Il1rn,RGD1563231,Ccr3
	antimicrobial humoral immune response mediated by antimicrobial peptide	9	S100a9,LOC100362027,Ppbp,Pglyrp1,Camp,Pf4,Np4,Defa5,Defa11
	oxygen transport	5	LOC103694855,Hbb,Hba1,Hbq1b,Hbb-b1
	killing of cells of other organism	5	LOC100362027,RatNP-3b,Pglyrp,Np4,Defa5
	defense response	9	Lilrb3,Ppbp,Camp,Pf4,Epx,Np4,Defa5,Mpo,Defa11
	cellular oxidant detoxification	8	S100a8,S100a9,Hp,Hbb,Epx,Fabp1,Hba1,Mpo
	chemokine-mediated signaling pathway	7	Ccl24,Ppbp,Ccl3,Pf4,Ccl9,Cxcr2,Ccr3
Molecular function	oxygen carrier activity	9	Hba2，LOC103694855，Hbb，LOC100134871，Hba1，Hba-a1，Hbq1b，Hbb-b1，LOC103694857
	oxygen binding	10	Hba2，LOC103694855，Hbb，Alb，LOC100134871，Hba1，Hba-a1，Hbq1b，Hbb-b1，LOC103694857
	heme binding	13	Hba2，LOC103694855，Hbb，LOC100363502，Epx，LOC100134871，Hba1，Hba-a1，Hbq1b，Hbb-b1， LOC103694857，Mpo，LOC100912471
	MHC class I protein binding	5	LOC100910669,RGD1561730,RGD1559588,LOC100910497,LOC685048
	chemokine activity	5	Ccl24,Ppbp,Ccl3,Pf4,Ccl9
	peptide antigen binding	5	LOC108348140,RT1-T24-4,RGD1562652,RT1-S3,RT1-A1
	endonuclease activity	7	Rnase2,Ankle1,Dnase1l3,Ear11,Ear1,Rag1,LOC100361814
	antioxidant activity	4	S100a8,S100a9,Hp,Fabp1
	heparin binding	8	Ctsg,Prss34,Prg2,Ccl3,Pf4,Elane,Prss57,Mpo
	lipid binding	10	Apol2,LOC100910885,Alb,Apol9a,Fabp7,Sec14l3,Hmgb2l1,Fabp1,Alox15,LOC679565
Celluar component	hemoglobin complex	9	extrinsic component of external side of plasma membrane
	extracellular space	39	Pla2g2a，Eln，Nppb，Prss34，S100a8，S100a9，Ccl24，Crisp3，Ppbp，RatNP-3b，Pglyrp1，Hp，Alb，Cdsn，R3hdml，LOC100910284，Ccl3，Camp，Prtn3，Pf4,Ccl9，Mmp8，Hmgb2l1，Epx，Cpa2，Np4，F5，Elane，Retnlg，Serpinb10，Prss57，Prss29，Defa5，Il1rn，Mpo，Fga，RGD1563231，Defa11，Ccr3
	extracellular region	39	Pla2g2a，Eln，Nppb，S100a8，S100a9，Il1r2，Ccl24，LOC24906，Crisp3，Ppbp，Apol2，LOC691921，LOC100910885，Pglyrp1，Hp，Dnase1l3，Alb，Ccl3，Apol9a，Camp，Fcna，Pf4，Fcnb，Ccl9，Mmp8，Pla2g2f，Mcpt8，Cpa2，Np4，F5，Retnlg，Prss57，Mcpt9，LOC108348103，Enpp6，Defa5，Il1rn，Fga，Defa11
	MHC class I protein complex	4	LOC108348140，RT1-T24-4，RGD1562652，RT1-A1
	azurophil granule lumen	2	Prtn3，Prss57
	haptoglobin-hemoglobin complex	2	Hbb，Hba1
	extrinsic component of external side of plasma membrane	2	Fcna，Fcnb
	cortical cytoskeleton	3	Spta1，Epb42，Slc4a1
	Sin3-type complex	2	Brms1，Hdac1l
	external side of plasma membrane	10	Aqp4，Ermap，Cd79b，RGD1562652，Csf3r，Cxcr2，Ms4a1，Btnl10，Fga，Ccr3

## Sheet: Down-regulated DEGs
Category	Term	Count	Genes
Biological process	muscle contraction	7	Myl1,Mylpf,Tnni2,Myom3,Mybpc1,Myh2,Tnnt3
	regulation of muscle contraction	4	Tnnc2,Tnni2,Atp2a1,Tnnt3
	retinoic acid biosynthetic process	3	Aldh1a1,Aldh1a2,LOC108348208
	embryonic skeletal joint morphogenesis	3	Osr1,Col2a1,Bmp7
	skeletal muscle thin filament assembly	3	Myom3,Mybpc1,Acta1
	retinoic acid metabolic process	3	Aldh1a1,Aldh1a2,LOC108348208
	regulation of retinoic acid receptor signaling pathway	2	Cyp26b1,LOC108348208
	metanephric mesenchyme morphogenesis	2	Osr1,Bmp7
	inner ear development	5	Gjb6,Col2a1,Eya4,Frem2,Bmper
	transcription, DNA-templated	16	LOC102551714,LOC102551626,Klhl31,Hmgn5,LOC103692976,LOC100912350,LOC102548133,LOC100911917,LOC102556157,LOC103691059,LOC100361850,Hells,LOC100911672,LOC100363472,LOC688583,RGD1563991
Molecular function	retinal dehydrogenase activity	2	Aldh1a1,Aldh1a2
	3-chloroallyl aldehyde dehydrogenase activity	2	Aldh1a1,Aldh1a2
	N-acetyltransferase activity	3	Nat8b,Nat8f3,Nat8f5
	structural constituent of muscle	3	Mylpf,Myom3,Mybpc1
	extracellular matrix structural constituent	4	Col2a1,Col9a1,Col4a5,Col4a6
	monooxygenase activity	5	Cyp4f37,Fmo3,Cyp26b1,Ch25h,Cyp4f5
	retinoic acid binding	2	Cyp26b1,LOC108348208
	inorganic anion exchanger activity	2	Slc22a8,Slc22a6
	hormone activity	5	Ttr,Edn1,Iapp,LOC100909521,Igf2
	cholesterol 25-hydroxylase activity	1	Ch25h
Celluar component	extracellular matrix	13	Col2a1,Dmp1,Mmp11,LOC100910790,Ntn1,Nov,Coch,Adamtsl2,Col9a1,Col4a5,Mfap4,Col26a1,Col4a6
	troponin complex	3	Tnnc2,Tnni2,Tnnt3
	collagen trimer	6	Col2a1,C1qtnf3,Col9a1,Col4a5,C1qtnf6,Col4a6
	MHC class II protein complex	3	RT1-Db2,RT1-Dma,LOC108348139
	extracellular region	30	Sfrp4,LOC103689965,Ttr,Col2a1,Ism1,Edn1,C1qtnf3,Iapp,Dmp1,Serpina10,Mmp11,Fmod,Adamtsl1,Bmp7,Apold1,LOC102552055,Cpz,Ntn1,Nov,Ptgds,Lpl,Mcpt1l1,Adamtsl2,Igf2,Col9a1,Mfap4,C1qtnf6,Csn1s1,Bmper,LOC100910418
	basement membrane	6	Col2a1,Lamc3,Ntn1,Col4a5,Frem2,Col4a6
	striated muscle thin filament	3	Myom3,Mybpc1,Acta1
	myofibril	4	Myl1,Mylpf,Casq1,Neb
	contractile fiber	3	Myl1,Mylpf,Neb
	collagen type IV trimer	2	Col4a5,Col4a6
